# Supplementary material
Source: publisher site journal article supplement (https://www.dovepress.com/article/312829)
Supplement: Supplementary file 1 [file get_supplementary_file.php]

الجنس: ذكر \ انثى

العمر: \_\_\_\_\_

الجامعة الملتحق بها: \_\_\_\_\_

التخصص: \_\_\_\_\_

معدل التوجيهي: \_\_\_\_\_

المعدل الجامعي: \_\_\_\_\_

الرجاء قم بوضع اشارة ✓ لكل جملة كما ترى تتناسب معك

| اعتراض بشده | اعتراض | حيادي | اوافق | أوافق بشده |                                                                          |
|-------------|--------|-------|-------|------------|--------------------------------------------------------------------------|
|             |        |       |       |            | 1 غالبًا ما أواجه المواقف دون أن أكون مستعدًا تمامًا                     |
|             |        |       |       |            | 2 نادرًا ما أشعر بالوحدة والكآبة                                         |
|             |        |       |       |            | 3 يعتقد بعض الناس بأنني فاطر الطبع شديد الحظر                            |
|             |        |       |       |            | 4 أعمل بجد بغية تحقيق أهدافي                                             |
|             |        |       |       |            | 5 عندما أتعرض للإهانة أحاول أن أسامح وأنسى وحسب                          |
|             |        |       |       |            | 6 أفضّل الأعمال التي تتيح لي العمل منفردًا بعيدًا عن إزعاج الآخرين       |
|             |        |       |       |            | 7 لست موثوقًا أو جديرًا بالثقة كما ينبغي بي أن أكون، في بعض الأحيان      |
|             |        |       |       |            | 8 ليس لدي أدنى اهتمام بالتكهن بطبيعة الكون أو بحال البشر                 |
|             |        |       |       |            | 9 لدي كثير من الفضول الفكري                                              |
|             |        |       |       |            | 10 نادرًا ما أكون حزينًا أو محبطًا                                       |
|             |        |       |       |            | 11 لا أستمتع كثيرًا بالدراسة مع الناس                                    |
|             |        |       |       |            | 12 أحافظ على أشيائي مرتبة ونظيفة                                         |
|             |        |       |       |            | 13 ليس من طبعي القلق                                                     |
|             |        |       |       |            | 14 أشعر بالافتتان بالأنماط التي أصادفها في الفن والطبيعة                 |
|             |        |       |       |            | 15 في كثير من الأحيان تثبط همتي وأشعر برغبة بالاستسلام عندما تسوء الأمور |
|             |        |       |       |            | 16 أنا جيدة جدًا في تنظيم نفسي لإنجاز الأمور في الوقت المحدد             |

|  |  |  |  |                                                                                                    |    |
|--|--|--|--|----------------------------------------------------------------------------------------------------|----|
|  |  |  |  | أحاول إنجاز الواجبات الموكولة إلي بكل أمانة                                                        | 17 |
|  |  |  |  | من الصعب أن أترك عقلي يهيم دون سيطرة أو توجيه                                                      | 18 |
|  |  |  |  | أتوق الى التميز في كل ما اعمل                                                                      | 19 |
|  |  |  |  | شعرت بالخجل في بعض الأحيان بصورة جعلتني أريد الاختباء وحسب                                         | 20 |
|  |  |  |  | أضحك بسهولة/ أضحك دون عناء                                                                         | 21 |
|  |  |  |  | غالبًا ما أشعر بالتوتر والعصبية                                                                    | 22 |
|  |  |  |  | عندما أقرأ الشعر او انظر في عمل فني ما تنتابني الفشعريرة او تغمرني الإثارة, في غير قليل من الاحوال | 23 |
|  |  |  |  | يعجبني أن أستغرق في خيال ما أو حلم يقظة بعينه، واستكشاف أبعادها كلها، وأتركها تنمو وتتطور          | 24 |
|  |  |  |  | غالبًا ما تثير غضبي طريقة معاملة الآخرين لي                                                        | 25 |
|  |  |  |  | يروقتي أن يكون حولي كثير من الناس/ تروق لي رفقة الناس                                              | 26 |
|  |  |  |  | أحاول عموماً أن اهتم بالآخرين وأراعي مشاعرهم                                                       | 27 |
|  |  |  |  | أشعر بعض الأحيان بأن لا قيمة لي البتة                                                              | 28 |
|  |  |  |  | عندما لا يروقتي الناس أصارحهم بذلك                                                                 | 29 |
|  |  |  |  | يعتقد بعض الناس أنني أناني و مغرور                                                                 | 30 |
|  |  |  |  | حياتي سريعة الإيقاع                                                                                | 31 |
|  |  |  |  | أنا انسان مثمر يقوم بعمله على أكمل وجه                                                             | 32 |
|  |  |  |  | للشعر تأثير ضئيل أو لا تأثير البتة علي                                                             | 33 |
|  |  |  |  | عندما أتعهد بالقيام بواجب ما فمن الممكن حقاً أن يعتمد عليّ به                                      | 34 |
|  |  |  |  | في بعض الأحيان أنتمّر على الناس أو أجاهلهم لدفعهم على فعل ما أريدهم أن يفعلوه                      | 35 |
|  |  |  |  | أفضل أن أمضي بطريقي لوحدني بدلاً من أن أكون قائدًا لآخرين                                          | 36 |
|  |  |  |  | أهدر كثيرًا من الوقت قبل أن أستقر بالعمل                                                           | 37 |
|  |  |  |  | يبدو أنني لن أكون منظمًا البتة                                                                     | 38 |
|  |  |  |  | لا اتعاطف مع المتسولين                                                                             | 39 |

|  |  |  |  |                                                                                                         |    |
|--|--|--|--|---------------------------------------------------------------------------------------------------------|----|
|  |  |  |  | أشعر أحياناً بأنني سوف أنهار حين أكون تحت ضغط كبير                                                      | 40 |
|  |  |  |  | غالبًا ما أشعر بأنني مليء بالطاقة                                                                       | 41 |
|  |  |  |  | أنا إنسان مرح وجريء                                                                                     | 42 |
|  |  |  |  | أخوض مجموعة واسعة من العواطف والمشاعر                                                                   | 43 |
|  |  |  |  | إن اقتضى الأمر فأنا على استعداد للتلاعب بالناس للحصول على ما أريد                                       | 44 |
|  |  |  |  | أنا مستعد للرد إن بدأ أحدهم القتال                                                                      | 45 |
|  |  |  |  | أحب أن أكون وسط الحدث                                                                                   | 46 |
|  |  |  |  | أنا إنسان نشيط                                                                                          | 47 |
|  |  |  |  | نادرًا ما ألحظ الحالات المزاجية أو المشاعر التي تنجم عن البيئات المختلفة                                | 48 |
|  |  |  |  | لدي مجموعة واضحة من الأهداف وأعمل بطريقة منظمة لتحقيقها                                                 | 49 |
|  |  |  |  | غالبًا ما أشعر بالعجز وأريد من الآخرين حل مشاكلي                                                        | 50 |
|  |  |  |  | يعجبني جدًا التحدّث مع الناس                                                                            | 51 |
|  |  |  |  | أنا أفضل من غالبية الناس، وأنا أدرك ذلك                                                                 | 52 |
|  |  |  |  | أميل إلى حسن الظن بالآخرين                                                                              | 53 |
|  |  |  |  | نادرًا ما أشعر بالخوف أو القلق                                                                          | 54 |
|  |  |  |  | أحاول أن أكون دمثًا مع الناس الذين أقابلهم                                                              | 55 |
|  |  |  |  | أحجل من الحشود/ أتجنب الحشود                                                                            | 56 |
|  |  |  |  | أعتقد أنه من الممتع أن نتعلّم ونطوّر هوايات جديدة                                                       | 57 |
|  |  |  |  | أعتقد بأن السماح للطلاب بالاستماع إلى متحدثين مثيرين للجدل لن ينجم عنه إلا حالة من الإرباك والتضليل لهم | 58 |
|  |  |  |  | أشعر كثيرًا بالمتعة عندما ألهو بالنظريات والأفكار المجردة                                               | 59 |
|  |  |  |  | شعرت في بعض الأحيان بالمرارة والاستياء                                                                  | 60 |
